# Supplementary material for: Ancient Protostome Origin of Chemosensory Ionotropic Glutamate Receptors and the Evolution of Insect Taste and Olfaction
Source: PLoS Genet. 2010 Aug 19;6(8):e1001064. doi: 10.1371/journal.pgen.1001064 (PMC2924276; doi:10.1371/journal.pgen.1001064)
Supplement: Table S1 — Drosophilid iGluR and IR repertoires. (0.04 MB XLS) [file pgen.1001064.s004.xls]

## Sheet: Table S1
Table S1. Drosophilid iGluR and IR repertoires.
		Dmel	Dsec	Dsim	Dere	Dyak	Dana	Dpse	Dper	Dwil	Dvir	Dmoj	Dgri	% identity
iGluR	CG11155	1	1	1i	1	1	1is	1is	1is	1	1	1	1	90.7
	CG3822	1	1	1	1	1	1	1	1	1	1	1	1	97.6
	CG5621	1	1	1	1	1s	1	1	1	1	1	1	1	88.7
	CG9935	1	1	1i	1	1	1i	1i	1	1	1	1	1	80.3
	Clumsy	1	1	1i	1	1	1	1	1	1	1	1	1	85.2
	Glu-R1	1	1i	1	1	1	1	1	1i	1	1	1	1	90.1
	Glu-R1B	1	1	1	1	1	1	1	1	1	1	1	1	91.7
	GluRIIA	1	1i	1	1	1	1	1	1	1	1	1	1	87.9
	GluRIIB	1	1	1	1	1	1	1	1	1	1	1	1	83
	GluRIIC	1	1	1	1	1	1	1	1	1	1	1	1	84.5
	GluRIID	1	1i	1	1	1	1	1	1	1	1	1	1	85.2
	GluRIIE	1	1	1	1	1	1	1	1	1	1	1	1	88.4
	Nmdar1	1	1	1	1	1	1	1	1	1	1	1	1	95.6
	Nmdar2	1	1	1i	1	1	1	1	1	1	1	1	1	95.2
antennal IRs	IR8a	1	1	1	1	1	1	1	1	1	1	1	1	77.9
	IR21a	1	1	1	1	1	1	1	1	1	1	1	1	78.9
	IR25a	1	1	1	1	1	1	1	1	1	1	1	1	92.1
	IR31a	1	1	1	1	1	1	1	1	1	1	1	1	72.5
	IR40a	1	1i	1i	1i	1i	1i	1	1	1i	1	1	1	77.7
	IR41a	1	1	1	1	1s	1	1	1	1	1	1	1	69.5
	IR60a	1	1	1	1	1	1	1	1	1	1	1	1	73.4
	IR64a	1	1	1	1	1	1	1	1	1	1	1	1	77.3
	IR68a	1	1	1	1	1	1	1	1	1	1	1	1	71.1
	IR75a	1	1p	1	1	1	1	1	1	1	1	1	1	75.3
	IR75b	1	1	1	1	1	1	1	1	1	1	1	1	67.2
	IR75c	1	1	1	1	1	1	1	1	1	1	1	1	70
	IR75d	1	1	1	1	1	1	1	1	1	1	1,1	1i	82.6
	IR76a	1	1	1	1	1	1	1	1	1	1	1	1	70.3
	IR76b	1	1	1	1	1	1	1	1	1	1	1	1	85.7
	IR84a	1	1	1	1	1s	1	1	1	1	1	1	1	69.6
	IR92a	1	1	1	1	1	1	1	1	1	1	1	1	74.4
	IR93a	1	1	1	1	1	1	1	1	1	1	1	1	80.8
divergent IRs	IR7a	1	1	1	1	1	1	1	1	1	1	1	1	57.4
	IR7b	1	1	1is	1	1	1	1	1	1	1	1	1	68.1
	IR7c	1	1	1	1	1	1	1	1	1	1	1	1	63.2
	IR7d	1	1	1	1	1	1	1	1	1	1	1	1,1	51.5
	IR7e	1	1	1is	1	1	1	1	1	1	1p,1p	1p,1p	1,1,1	68.1
	IR7f	1	1	1is	1	1	1	1	1	1	1	1	1i,1p	61.8
	IR7g	1	1	1s	1	1	1	1	1	0	1	1p	1	73.9
	IR10a	1p	1	1is	1	1	1	1	1	1	1	1	1	70.3
	IR11a	1	1	1	1	1	1	1	1	1	1	0	0	59.6
	IR20a	1	1	1	1	1	0	1	1	1	1	1	1i
	IR94h	1	1	1is	1	1	1
	IR47a	1	1p	1	1	1	1,1,1,1,1,1	1,1,1	1,1,1p,1p	1,1,1, 1p	1,1,1,1,1	1,1,1,1,1p	1,1
	IR47b	1p	1p	1	1p	1p
	IR94a	1	1p	1s	1	1
	IR94b	1	1p	1s	0	1
	IR94c	1	1	1	1	1
	IR94i	0	1p	1	0	1
	IR48a	1p	1p	1	0	1	1	1,1	1,1	1,1	1,1	1,1	1,1
	IR48b	1	1	1	1	1	1
	IR48c	1	1	1	1	1	1p	1	1	1	0	0	0	71.9
	IR51a	1p	1	1	1	1	1	1,1	1,1	1,1	1	1	1
	IR51b	1	1	1	1	1	1
	IR52a	1	1	1	1	1	1	1,1	1,1	1	1	1,1,1	1,1s,1s
	IR52b	1	1	1	1	1	1,1,1
	IR52c	1	1p	1	1	1
	IR52d	1	1	1	1p	1
	IR52e	0	1p	1	1	1
	IR52f	0	1	1	1	1p
	IR54a	1	1	1	1	1	1	1	1	1	1	1	1	54.2
	IR56a	1	1	1	1	1	1	1	1	1	1,1p	1	1	37.2
	IR56b	1	1	1	1	1	1	1	1	1	1	1	1	68
	IR56c	1	1	1	1	1	1p	1	1	1	1	1	1	71.2
	IR56d	1	1	1	1	1	1	1	1	1	1	1	1	65.2
	IR56e	1p	1p	1p	1p	1p	1	0	0	1	1	1	1	42.9
	IR60b	1	1	1	1	1	1,1,1	1,1	1,1	1,1,1p	1	1	1
	IR60c	1p	1p	1	1	1
	IR60d	1	1p	1p	1	1
	IR60f	1p	1	1	1	0	1	1	1
	IR60e	1p	1	1	1	1	1	1	1	1	1p	1	1	51.1
	IR62a	1	1	1	1	1	1	1	1	1	1	1	1	56
	IR67a	1p	1	1	1	1	1p	1	1	1	1p	1	1	54.9
	IR67b	1	1	1	1	1	1	1	1	1p	1	1	1	57.6
	IR67c	1	1p	1	1	1	1	1	1	1	0	0	0	60.1
	IR68b	1	1	1	1	1	1	1	1	1,1	1	1,1	1,1p	60.2
	IR85a	1	1	1	1	1	1	1	1	1	1	1	1	72
	IR87a	1	1	1	1	1	1	1	1	1	1	1	1	66.5
	IR94d	1	1	1	1	1	1	1	1	1	1	0	0	63.6
	IR94e	1	1	1	1	1	1	1	1	1	1	1,1	1	63
	IR94f	1	1	1	1	1	1	0	0	1,1	1	1	1	51.6
	IR94g	1	1	1is	1	1	1	1	1	1	1	1	1	54.4
	IR100a	1	1	1	1	1	1	1	1	1	1	1	1	70.4
	total loci	80	83	83	80	82	80	72	73	75	72	74	72
Presence of genes orthologous to D. melanogaster iGluRs and IRs in drosophilid species are indicated with a “1”. One-to-one gene orthology could not be established for certain groups of closely-related IRs in species distant from D. melanogaster; in these cases, rows have been combined. Pseudogenes (containing frameshift or nonsense mutations, or gene truncations) are denoted as “1p”. Genes that …
