# Supplementary material for: Ancient Protostome Origin of Chemosensory Ionotropic Glutamate Receptors and the Evolution of Insect Taste and Olfaction
Source: PLoS Genet. 2010 Aug 19;6(8):e1001064. doi: 10.1371/journal.pgen.1001064 (PMC2924276; doi:10.1371/journal.pgen.1001064)
Supplement: Table S4 — Nonsynonymous to synonymous substitution rates of IR genes. (0.03 MB XLS) [file pgen.1001064.s007.xls]

## Sheet: TableS4
Table S4. Nonsynonymous to synonymous substitution rates of IR genes.
Gene	dN/dS all species	dN/dS melanogaster subgroup	2(lnLM8-lnLM7)	P	p1 M8	ω1 M8
CG3822	0.01274	0.0059
CG5621	0.04545	0.0381
CG9935	0.06078
clumsy	0.06092	0.0812
Glu-R1	0.0603	0.0476
Glu-R1B	0.0597	0.0469
GluRIIA	0.05143	0.0795
GluRIIB	0.07134	0.0674
GluRIIC	0.06677	0.0548
GluRIID	0.06031	0.0573
GluRIIE	0.05038	0.044
Nmdar1	0.01963	0.0118
Nmdar2	0.00322	0.0202
IR8a	0.08977	0.0859	-0.001794
IR21a	0.08557	0.1322	0.457154	0.795665
IR25a	0.02837	0.0496	2.82506	0.243526
IR31a	0.10379	0.1244	-1.4e-05
IR41a	0.12127	0.2213	1.36282	0.505904
IR60a	0.10369	0.1571	8.54532	0.0139447	0.08019	1.26492
IR64a	0.10701	0.0732	-0.001668
IR68a	0.1141	0.12	2.56098	0.277901
IR75a	0.10745	0.1087	-0.00111
IR75b	0.13684	0.1744	7.37323	0.0250567	0.00223	14.1082
IR75c	0.11745	0.0814	-7.8e-05
IR75d	0.08417	0.0508	-0.001348
IR76a	0.1335	0.1715	0.799652	0.670437
IR76b	0.06295	0.1159	0.137336	0.933637
IR84a	0.15001	0.2061	1.02627	0.598617
IR92a	0.13667	0.1353	0.449906	0.798554
IR93a	0.07045	0.0868	6.7713	0.0338557	0.04978	1
IR7a	0.14241	0.1151	2.36055	0.307194
IR7b	0.12079	0.1418	-9.6e-05
IR7c	0.13501	0.1391	-0.001208
IR7d	0.1744	0.1544	0.017882	0.991099
IR7e		0.0665	-0.001152
IR7f	0.12294	0.1283	0.001732	0.999134
IR7g	0.08117	0.0708	-0.001152
IR10a	0.09918
IR11a	0.11343	0.1704	-0.001016
IR20a			2.64954	0.265864
IR48b		0.1472	-0.001108
IR48c	0.15127		1.69216	0.429095
IR51a		0.2253	8.49294	0.0143146	0.01669	3.8565
IR51b		0.2524	-0.001162
IR52a		0.2365	3.74915	0.15342
IR54a	0.19324	0.2466	-4e-06
IR56a	0.34592	0.5067	0.70545	0.70277
IR56b	0.10258	0.1202	0.23512	0.889087
IR56c	0.10505		1.23481	0.539341
IR56d	0.10533	0.1074	-0.001214
IR60e	0.19783	0.2868	2.38217	0.303892
IR62a	0.18466	0.272	0.93543	0.626432
IR67a	0.17712	0.1572	-4e-05
IR67b	0.16711	0.2304	0.643828	0.724761
IR67c	0.15544	0.1801	0.001466	0.999267
IR68b	0.14762	0.1764	4.65145	0.0977127
IR85a	0.1038	0.1312	1.06868	0.586055
IR94d	0.16826	0.2638	0.624472	0.731809
IR94e	0.15401	0.183	0.105196	0.948761
IR94f	0.21757	0.2573	2.91896	0.232357
IR94g	0.1819	0.1726	-7e-05
IR94h		0.275	0.901258	0.637227
IR100a	0.14362	0.1896	6.12397	0.0467948	0.00563	7.48625
dN/dS ratio and results of the test for positive selection (M7-M8 comparison) for each gene. P values are uncorrected and were calculated assuming a X2 distribution with 2 d.f. (the Bonferroni corrected p value is 0.001). p1 is the proportion of sites that were estimated to have evolved under a selective pressure of ω1 applying model M8.
